# Supplementary material for: Insights into capacity loss mechanisms of all-solid-state Li-ion batteries with Al anodes
Source: Royal Society of Chemistry journal article supplement (doi:10.1039/c4ta03716b), 2014-01-01
Supplement: c4ta03716b1.pdf [file c4ta03716b1.pdf]

## Supporting Materials

# New insights from in-situ electron microscopy into capacity loss mechanisms in Li-ion batteries with Al anodes

*Marina S. Leite<sup>1,2,3\*</sup>, Dmitry Ruzmetov<sup>2,3</sup>, Zhipeng Li<sup>4</sup>, Leonid A. Bendersky<sup>4</sup>, Norman C.  
Bartelt<sup>5</sup> Andrei Kolmakov<sup>2</sup>, and A. Alec Talin<sup>2,5\*</sup>*

<sup>1</sup>Department of Materials Science and Engineering, Institute for Research in Electronics and  
Applied Physics, College Park, MD 20742-2115, USA

<sup>2</sup>Center for Nanoscale Science and Technology, NIST, Gaithersburg, MD, USA

<sup>3</sup>Maryland NanoCenter, University of Maryland, College Park, MD, 20899-6204, USA

<sup>4</sup>Material Measurement Laboratory, NIST, Gaithersburg, MD, USA

<sup>5</sup>Sandia National Laboratories, Livermore, CA, USA

\*Corresponding Authors: mleite@umd.edu, aatalin@sandia.gov

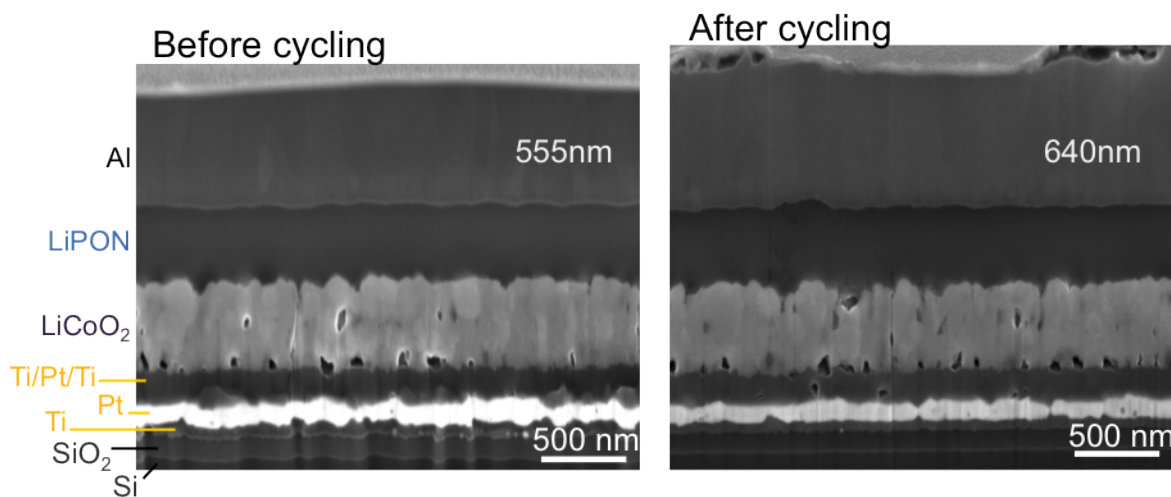

**Supporting Figure S1:** Cross-section SEM images of Al anode battery before and after 10 cycles. After cycling, the thickness of the anode expands in  $\approx 16\%$ . Detector: TLD, 5.0 keV, beam current: 10 nA).

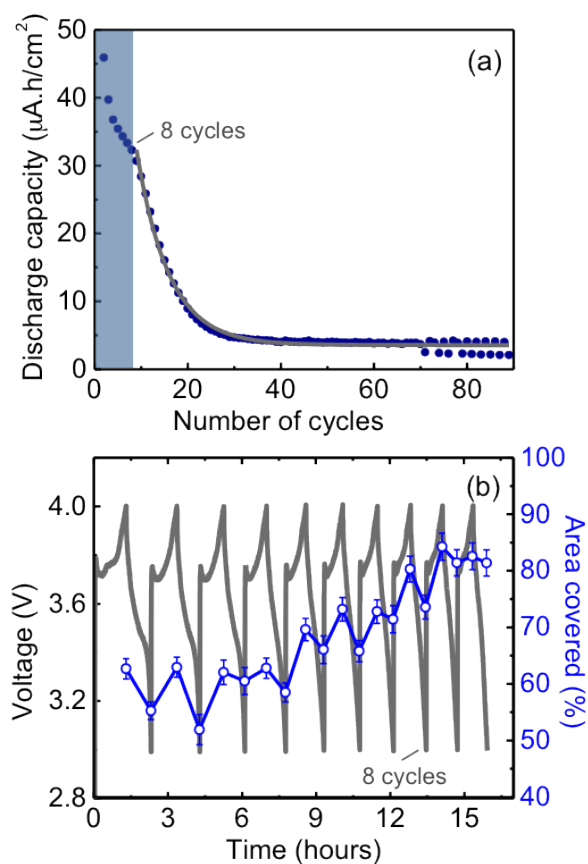

**Supporting Figure S2:** (a) Discharge capacity as a function of number of cycles at 10 nA. (b) Galvanostatic cycling overlaid by area percentage covered with Li-Al cluster after 10 cycles at 30 nA.

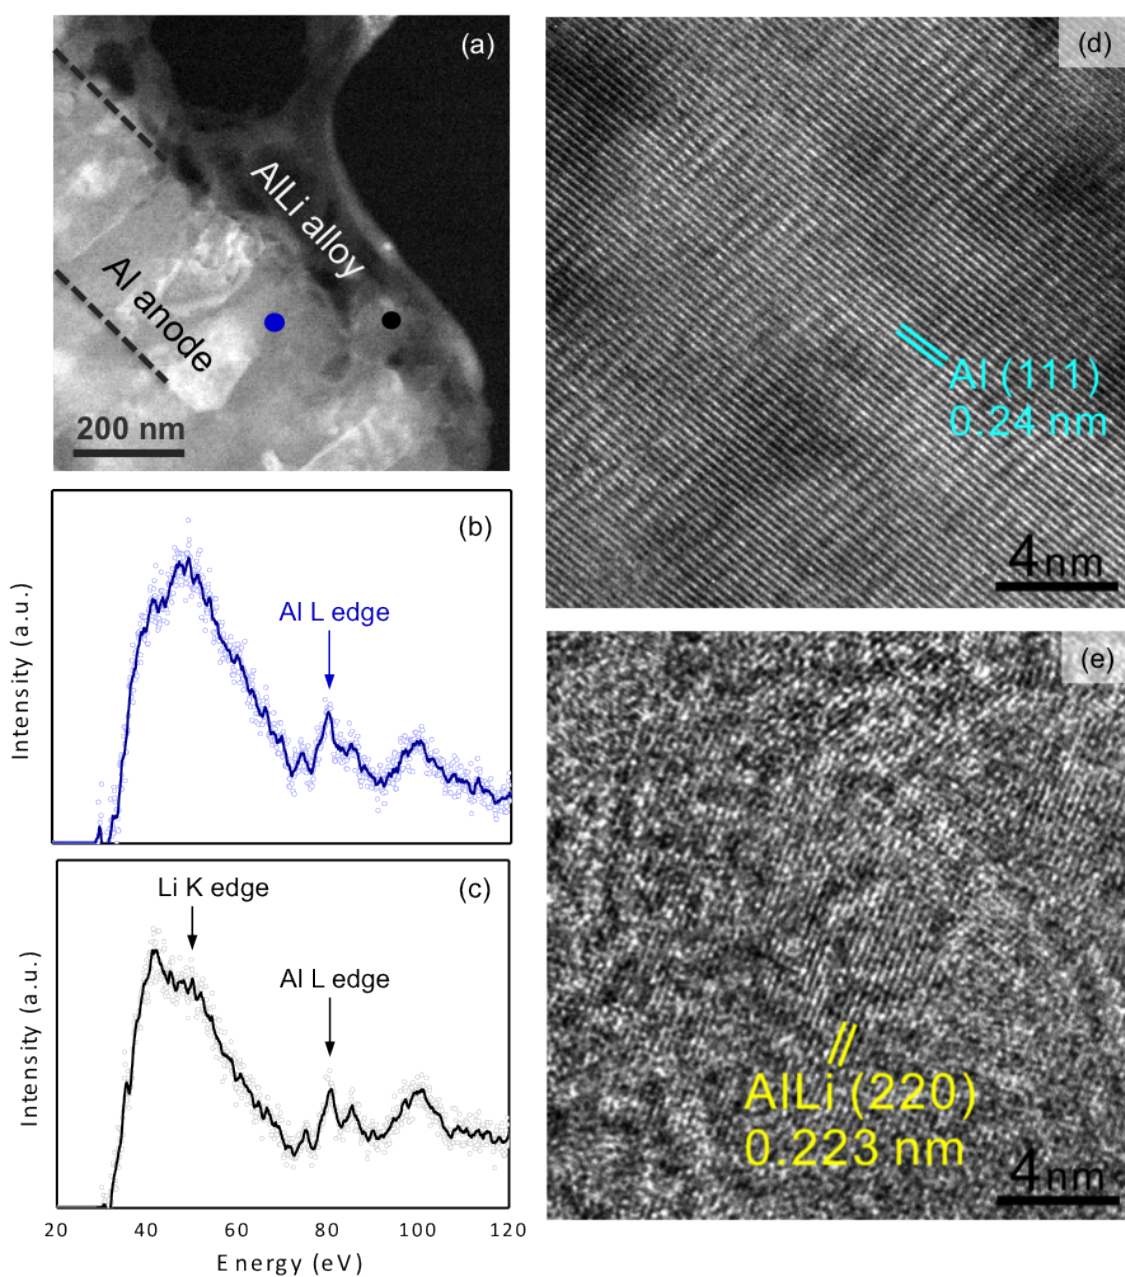

**Figure S3:** (a) STEM dark image of the Al-Li cluster (darker contrast) on Al anode (brighter contrast). EELS spectra taken from (b) Al anode and (c) Al-Li cluster at the positions indicated in the STEM image shows only Al L-edge for (b) and both Al L-edge and Li K-edge for (c). Atomic resolution TEM images of (d) Al anode and (e) Al-Li cluster with identified lattice fringes nanoscale crystals.
